# Supplementary material for: Transcriptome analysis of two Pogostemon cablin chemotypes reveals genes related to patchouli alcohol biosynthesis
Source: PeerJ. 2021 Aug 26;9:e12025. doi: 10.7717/peerj.12025 (PMC8403477; doi:10.7717/peerj.12025)
Supplement: Supplemental Information 11 [file peerj-09-12025-s011.xls]

## Sheet: NX
Sample Name	Primer Name	Gene Primer	Cq	Cq Mean	△Ct	△△Ct	2^-△△Ct
NX	18s rRNA	18s rRNA	21.95	21.78
NX	18s rRNA		21.61	21.78
NX	18s rRNA		21.77	21.78
NX	PC-2	TRINITY_DN15930_c0_g1_i5	19.07	19.13	-2.71	0	1
NX	PC-2		19.19	19.13	-2.59	0	1
NX	PC-2		19.13	19.13	-2.65	0	1
NX	PC-4	TRINITY_DN20235_c0_g1_i3	26.3	26.33	4.52	0	1
NX	PC-4		26.33	26.33	4.55	0	1
NX	PC-4		26.35	26.33	4.57	0	1
NX	PC-8	TRINITY_DN24538_c2_g3_i1	27.62	27.67	5.84	0	1
NX	PC-8		27.7	27.67	5.92	0	1
NX	PC-8		27.7	27.67	5.92	0	1
NX	PC-10	TRINITY_DN27775_c0_g2_i2	30.19	30.24	8.41	0	1
NX	PC-10		30.25	30.24	8.47	0	1
NX	PC-10		30.27	30.24	8.49	0	1
NX	PC-11	TRINITY_DN30536_c2_g1_i3	27.02	27.07	5.24	0	1
NX	PC-11		27.2	27.07	5.42	0	1
NX	PC-11		26.99	27.07	5.21	0	1
NX	PC-13	TRINITY_DN18757_c0_g1_i1	25.74	25.76	3.96	0	1
NX	PC-13		25.71	25.76	3.93	0	1
NX	PC-13		25.82	25.76	4.04	0	1
NX	PC-19	TRINITY_DN22349_c0_g2_i1	28.89	28.9	7.11	0	1
NX	PC-19		28.87	28.9	7.09	0	1
NX	PC-19		28.95	28.9	7.17	0	1
NX	PC-22	TRINITY_DN21681_c0_g1_i2	22.41	22.39	0.63	0	1
NX	PC-22		22.37	22.39	0.59	0	1
NX	PC-22		22.39	22.39	0.61	0	1
NX	PC-24	TRINITY_DN14252_c0_g1_i1	22.45	22.71	0.67	0	1
NX	PC-24		22.96	22.71	1.18	0	1
NX	PC-24		22.72	22.71	0.94	0	1
NX	PC-25	TRINITY_DN14955_c0_g1_i1	23.67	23.68	1.89	0	1
NX	PC-25		23.67	23.68	1.89	0	1
NX	PC-25		23.69	23.68	1.91	0	1
NX	PC-28	TRINITY_DN29365_c0_g2_i1	24.63	24.73	2.85	0	1
NX	PC-28		24.74	24.73	2.96	0	1
NX	PC-28		24.81	24.73	3.03	0	1
NX	PC-30	TRINITY_DN30344_c0_g2_i7	21.59	21.51	-0.19	0	1
NX	PC-30		21.47	21.51	-0.31	0	1
NX	PC-30		21.47	21.51	-0.31	0	1

## Sheet: PX
Sample Name	Primer Name	Gene Name	Cq	Cq Mean	△Ct	△△Ct	2^-△△Ct
PX	18s rRNA	18s rRNA	21.54	21.76
PX	18s rRNA		21.68	21.76
PX	18s rRNA		22.05	21.76
PX	PC-2	TRINITY_DN15930_c0_g1_i5	26.09	25.2	4.33	6.98	0.00792156
PX	PC-2		24.69	25.2	2.93	5.58	0.0209051
PX	PC-2		24.82	25.2	3.06	5.71	0.0191038
PX	PC-4	TRINITY_DN20235_c0_g1_i3	26.97	26.92	5.21	0.663333	0.631418
PX	PC-4		26.96	26.92	5.2	0.653333	0.63581
PX	PC-4		26.83	26.92	5.07	0.523333	0.695762
PX	PC-8	TRINITY_DN24538_c2_g3_i1	27.99	27.87	6.23	0.336667	0.791869
PX	PC-8		27.89	27.87	6.13	0.236667	0.848704
PX	PC-8		27.74	27.87	5.98	0.0866667	0.941696
PX	PC-10	TRINITY_DN27775_c0_g2_i2	27.74	27.7	5.98	-2.47667	5.5661
PX	PC-10		27.56	27.7	5.8	-2.65667	6.30574
PX	PC-10		27.8	27.7	6.04	-2.41667	5.33936
PX	PC-11	TRINITY_DN30536_c2_g1_i3	25.27	25.33	3.51	-1.78	3.43426
PX	PC-11		25.35	25.33	3.59	-1.7	3.24901
PX	PC-11		25.38	25.33	3.62	-1.67	3.18215
PX	PC-13	TRINITY_DN18757_c0_g1_i1	24.75	24.75	2.99	-0.986667	1.9816
PX	PC-13		24.71	24.75	2.95	-1.02667	2.03731
PX	PC-13		24.79	24.75	3.03	-0.946667	1.92741
PX	PC-19	TRINITY_DN22349_c0_g2_i1	29.15	29.4	7.39	0.266667	0.831238
PX	PC-19		29.73	29.4	7.97	0.846667	0.556068
PX	PC-19		29.33	29.4	7.57	0.446667	0.733736
PX	PC-22	TRINITY_DN21681_c0_g1_i2	20.54	20.5567	-1.22	-1.83	3.55537
PX	PC-22		20.6	20.5567	-1.16	-1.77	3.41054
PX	PC-22		20.53	20.5567	-1.23	-1.84	3.5801
PX	PC-24	TRINITY_DN14252_c0_g1_i1	23.65	23.75	1.89	0.96	0.514057
PX	PC-24		24.13	23.75	2.37	1.44	0.368567
PX	PC-24		23.48	23.75	1.72	0.79	0.578344
PX	PC-25	TRINITY_DN14955_c0_g1_i1	25.42	25.5	3.66	1.76333	0.294567
PX	PC-25		25.56	25.5	3.8	1.90333	0.267325
PX	PC-25		25.52	25.5	3.76	1.86333	0.274841
PX	PC-28	TRINITY_DN29365_c0_g2_i1	24.04	23.9533	2.28	-0.666667	1.5874
PX	PC-28		23.83	23.9533	2.07	-0.876667	1.83613
PX	PC-28		23.99	23.9533	2.23	-0.716667	1.64338
PX	PC-30	TRINITY_DN30344_c0_g2_i7	22.69	22.7	0.93	1.2	0.435275
PX	PC-30		22.72	22.7	0.96	1.23	0.426317
PX	PC-30		22.7	22.7	0.94	1.21	0.432269

## Sheet: FPKM
Unigene	NX1	NX2	NX3	PX1	PX2	PX3
TRINITY_DN15930_c0_g1_i5	636.786	643.62	645.344	15.1214	16.4637	15.8559
TRINITY_DN20235_c0_g1_i3	10.2895	9.71669	11.1181	3.79009	3.85411	3.73065
TRINITY_DN24538_c2_g3_i1	2.72399	3.56406	3.53218	1.50286	0.973688	1.09021
TRINITY_DN27775_c0_g2_i2	0.41155	0.500702	0.722736	1.32756	1.87828	1.43777
TRINITY_DN30536_c2_g1_i3	3.28514	3.40581	3.14477	5.61124	6.69239	5.94009
TRINITY_DN18757_c0_g1_i1	16.1468	19.3658	15.857	31.0155	31.8484	27.5464
TRINITY_DN22349_c0_g2_i1	18.1864	19.4375	16.3721	4.54951	4.83044	6.827
TRINITY_DN21681_c0_g1_i2	52.7946	45.2946	49.8735	82.8153	85.5911	84.6166
TRINITY_DN14252_c0_g1_i1	101.902	101.325	75.2423	29.4314	20.3813	23.4937
TRINITY_DN14955_c0_g1_i1	112.062	120.253	117.832	26.3946	30.5035	27.2198
TRINITY_DN29365_c0_g2_i1	1.10711	1.76875	1.8074	0.163415	0.241292	0.356569
TRINITY_DN30344_c0_g2_i7	48.4248	49.5407	52.1167	15.012	14.8454	13.9535
